# Supplementary material for: In vitro conversion of chanoclavine-I aldehyde to the stereoisomers festuclavine and pyroclavine controlled by the second reduction step
Source: Royal Society of Chemistry journal article supplement (doi:10.1039/c2ra20104f), 2012-01-01
Supplement: c2ra20104f.pdf [file c2ra20104f.pdf]

## Electronic Supporting Information to:

### ***In vitro* conversion of chanoclavine-I aldehyde to the stereoisomers festuclavine and pyroclavine was controlled by the second reduction step**

Marco Matuschek <sup>a</sup>, Christiane Wallwey <sup>a</sup>, Beate Wollinsky <sup>a</sup>, Xiulan Xie <sup>b</sup> and  
Shu-Ming Li <sup>a</sup> \*

<sup>a</sup> *Philipps-Universität Marburg, Institut für Pharmazeutische Biologie und Biotechnologie, Deutschhausstraße 17A, D-35037 Marburg, Germany. Email: shuming.li@Staff.uni-Marburg.de, Tel: 0049-6421-2822461, Fax: 0049-6421-2825365*

<sup>b</sup> *Philipps-Universität Marburg, Fachbereich Chemie, Hans-Meerwein-Straße, 35032 Marburg, Germany.*

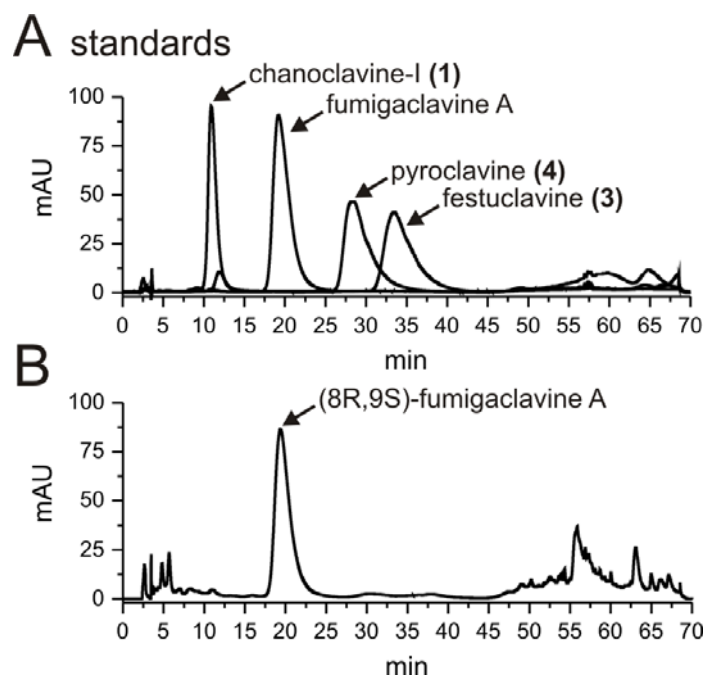

**Figure S1** HPLC analysis of the cultural extract of *P. commune* NRRL 2033 (B) by using ergot alkaloids or precursors as standards (A). The substances were detected with a Photodiode Array detector and illustrated for absorption at 282 nm.

**Table S1**  $^1\text{H}$ -NMR and  $^{13}\text{C}$ -NMR data of (8R,9S)-fumigaclavine A in protonated form ( $\text{CD}_3\text{OD}$ )

| Position       | $\delta_{\text{C}}$ | $\delta_{\text{H}}$ , multi., $J$ in Hz | HMBC correlation             |
|----------------|---------------------|-----------------------------------------|------------------------------|
| 2              | 120.69              | 7.07, d, 1.3                            | C-2 to H-14                  |
| 3              | 107.80              | -                                       | C-3 to H-2                   |
| 4 $_{\alpha}$  | 25.15               | 3.03, ddd, 1.2, 11.7, 12.9              | -                            |
| 4 $_{\beta}$   |                     | 3.74, m                                 |                              |
| 5 $_{\beta}$   | 64.16               | 3.80, m                                 | C-5 to H-18                  |
| 7 $_{\alpha}$  | 58.25               | 3.49, d, 13.0                           | C-7 to H-17, H-18            |
| 7 $_{\beta}$   |                     | 3.66, dd, 12.9, 4.0                     |                              |
| 8 $_{\beta}$   | 33.26               | 2.47, m                                 | C-8 to H-17                  |
| 9 $_{\alpha}$  | 69.89               | 5.78, br s                              | C-9 to H-17, H-7 $_{\alpha}$ |
| 10 $_{\alpha}$ | 39.39               | 3.73, m                                 | -                            |
| 11             | 126.91              | -                                       | C-11 to H-13                 |
| 12             | 113.69              | 6.76, d, 7.2                            | C-12 to H-14                 |
| 13             | 123.89              | 7.10, t, 7.7                            | C-13 to H-14                 |
| 14             | 110.84              | 7.22, d, 8.1                            | C-14 to H-12                 |
| 15             | 135.72              | -                                       | C-15 to H-2                  |
| 16             | 127.67              | -                                       | C-16 to H-2, H-12, H-14      |
| 17             | 15.40               | 1.41, d, 7.6                            | C-17 to H-7 $_{\beta}$       |
| 18             | 42.42               | 3.15, s                                 | -                            |
| 19             | 172.08              | -                                       | C-19 to H-20                 |
| 20             | 20.66               | 1.88, s                                 | -                            |

**Table S2** NOE contacts for proving the stereochemistry of (8R,9S)-fumigaclavine A

| Protons                             | Strength |
|-------------------------------------|----------|
| H-5 $_{\beta}$ to H-7 $_{\beta}$    | Medium   |
| H-10 $_{\alpha}$ to H-4 $_{\alpha}$ | Medium   |
| H-9 $_{\alpha}$ to H-17             | Medium   |
| H-9 $_{\alpha}$ to H-10 $_{\alpha}$ | Medium   |
| H-17 to H-10 $_{\alpha}$            | Medium   |
| H-17 to H-7 $_{\alpha}$             | Medium   |

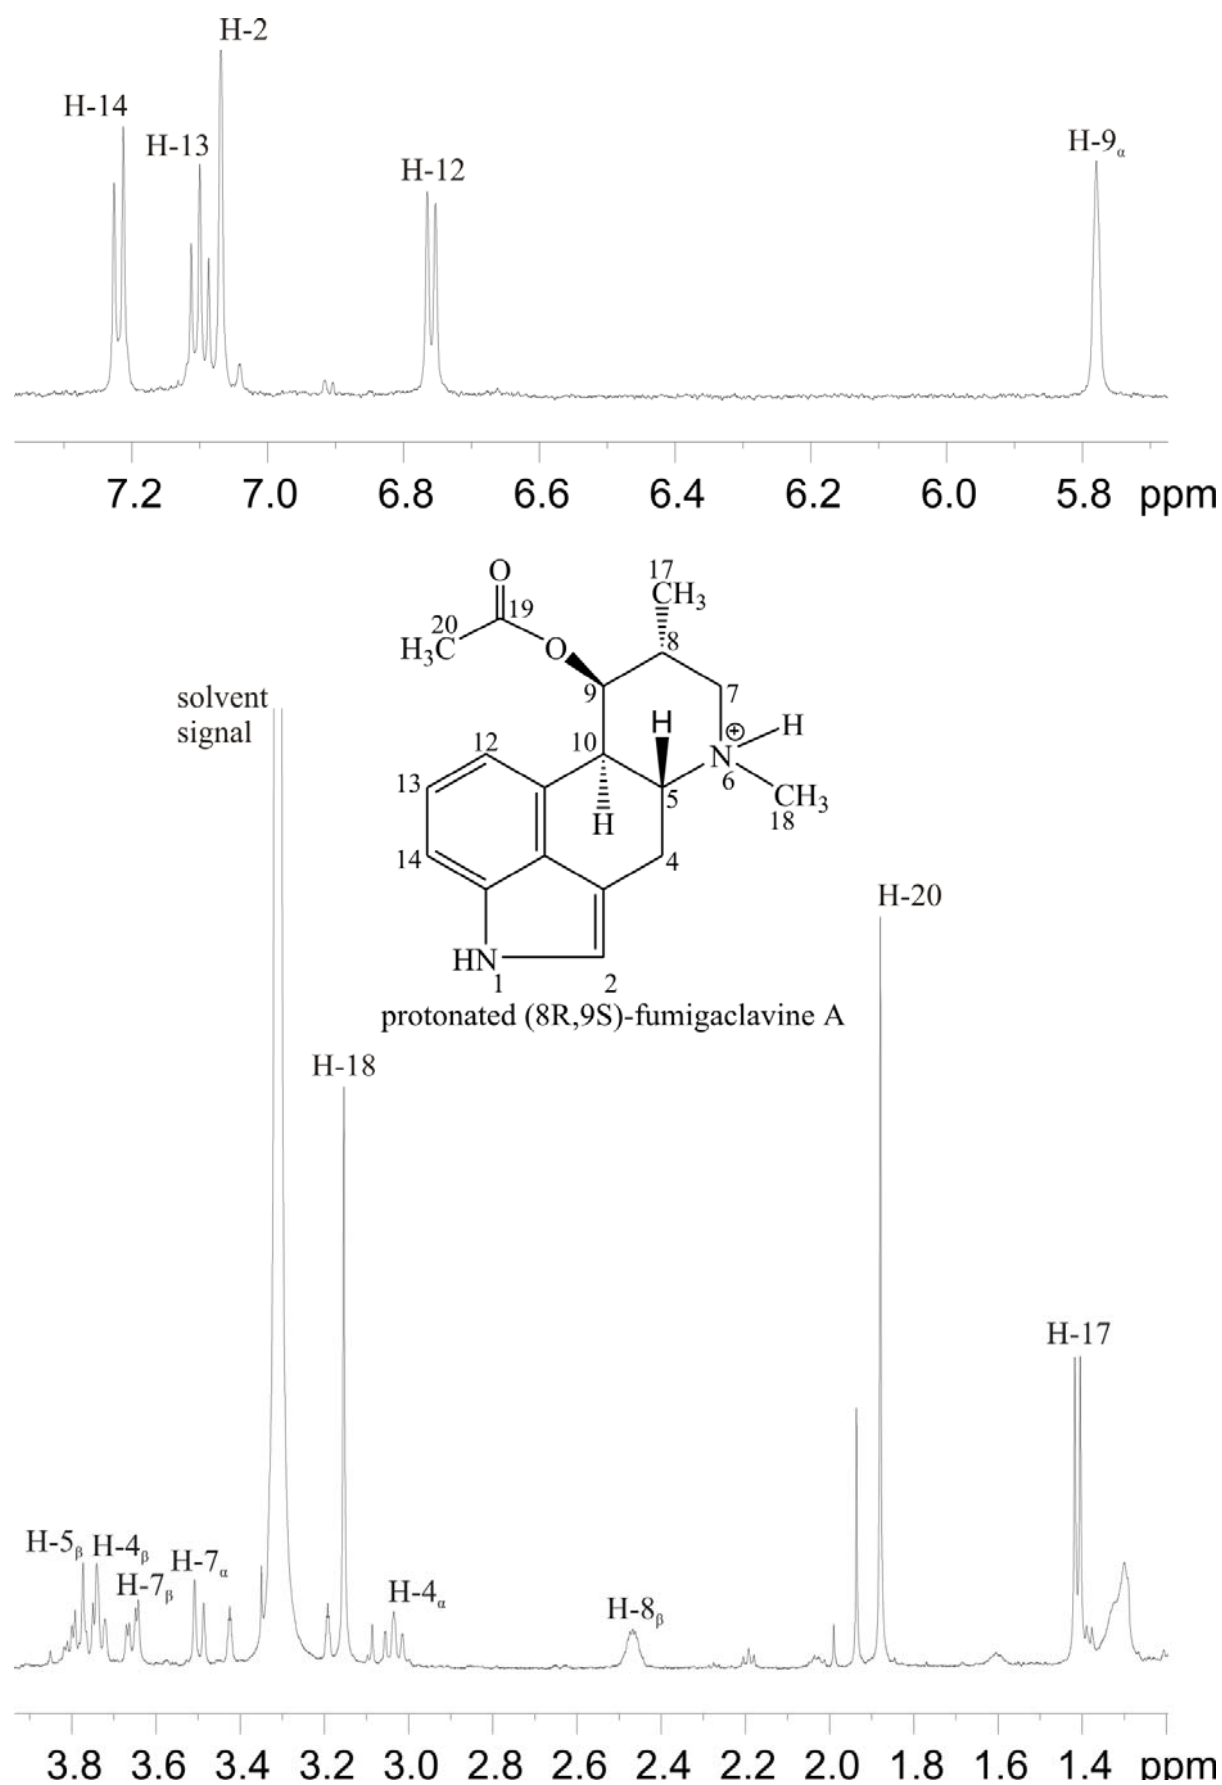

**Figure S2.1**  $^1\text{H}$ -NMR spectrum of (8R,9S)-fumigaclavine A in protonated form in  $\text{CD}_3\text{OD}$

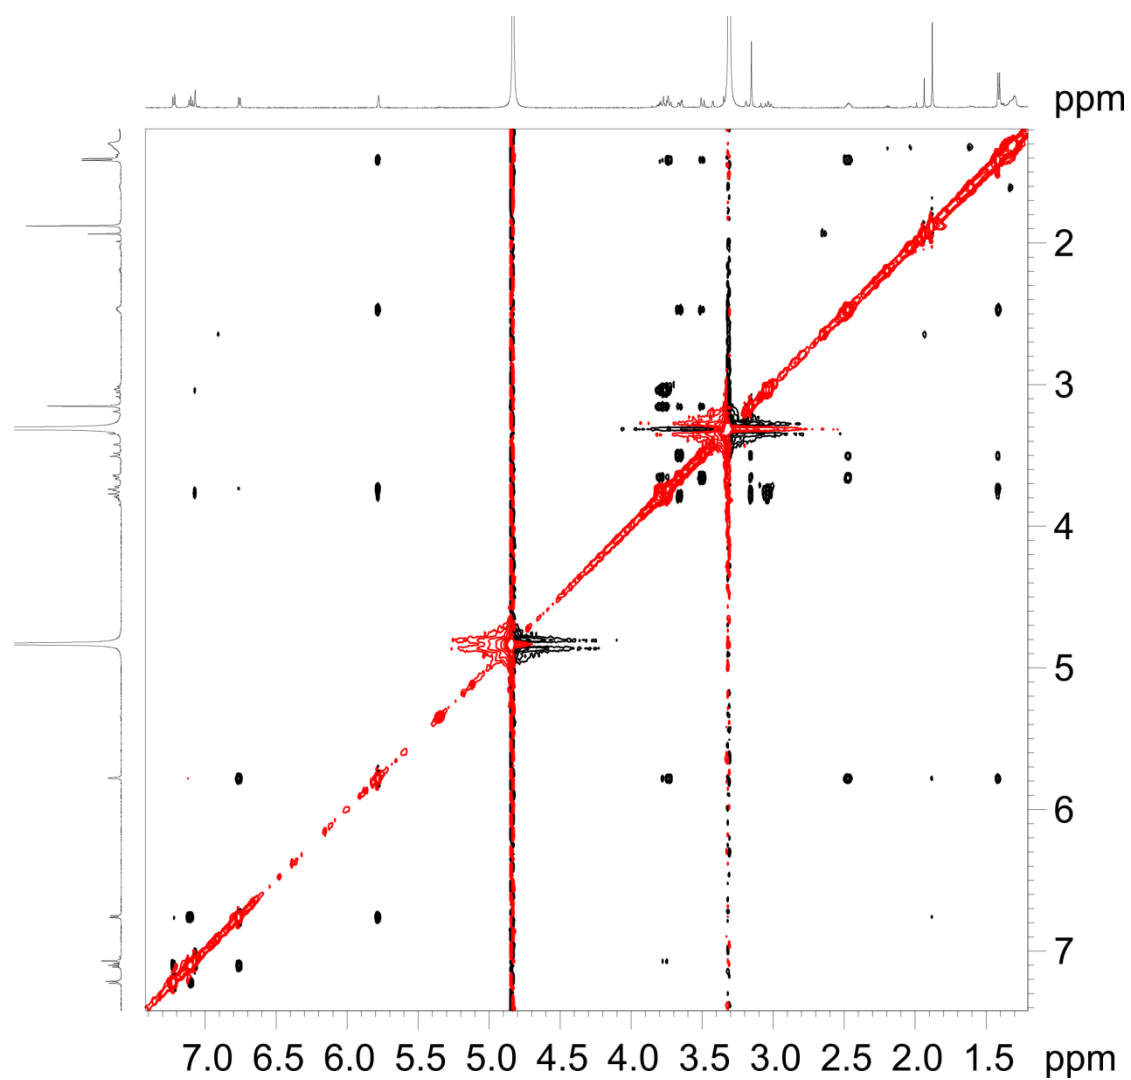

**Figure S2.2** NOESY spectrum of (8R,9S)-fumigaclavine A in protonated form in CD<sub>3</sub>OD

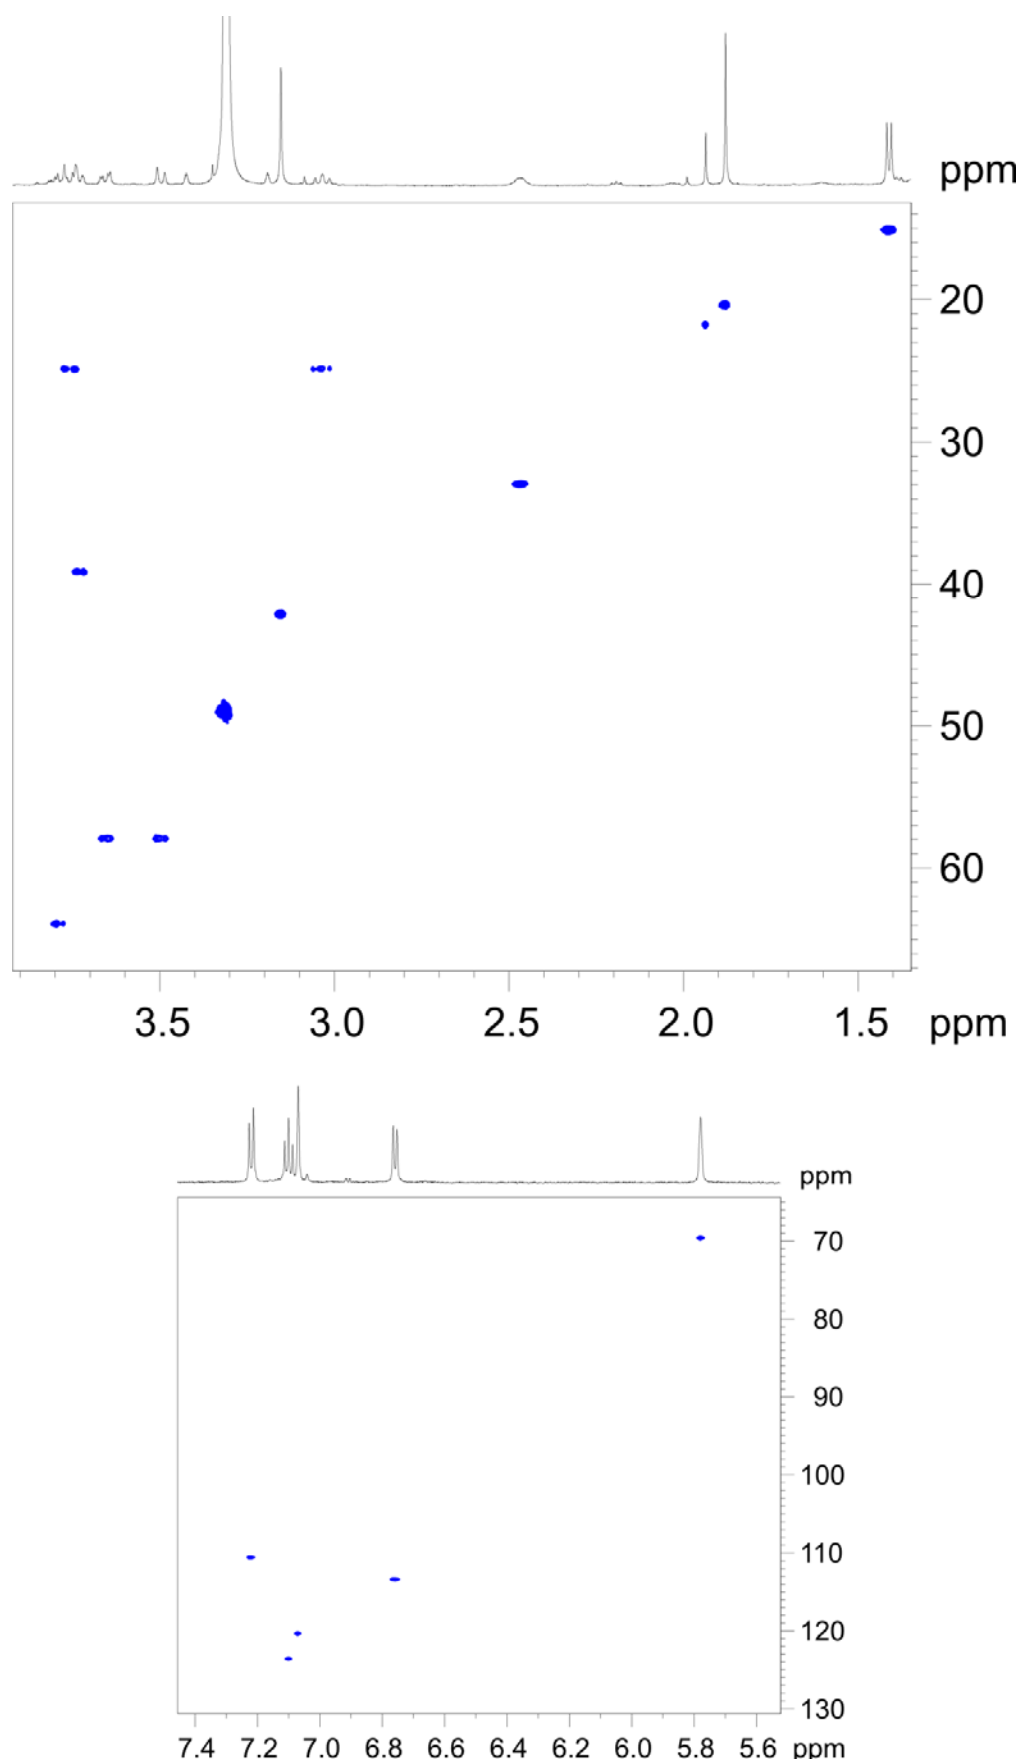

**Figure S2.3** Enhanced parts of the HSQC spectrum of (8R,9S)-fumigaclavine A in protonated form in  $\text{CD}_3\text{OD}$

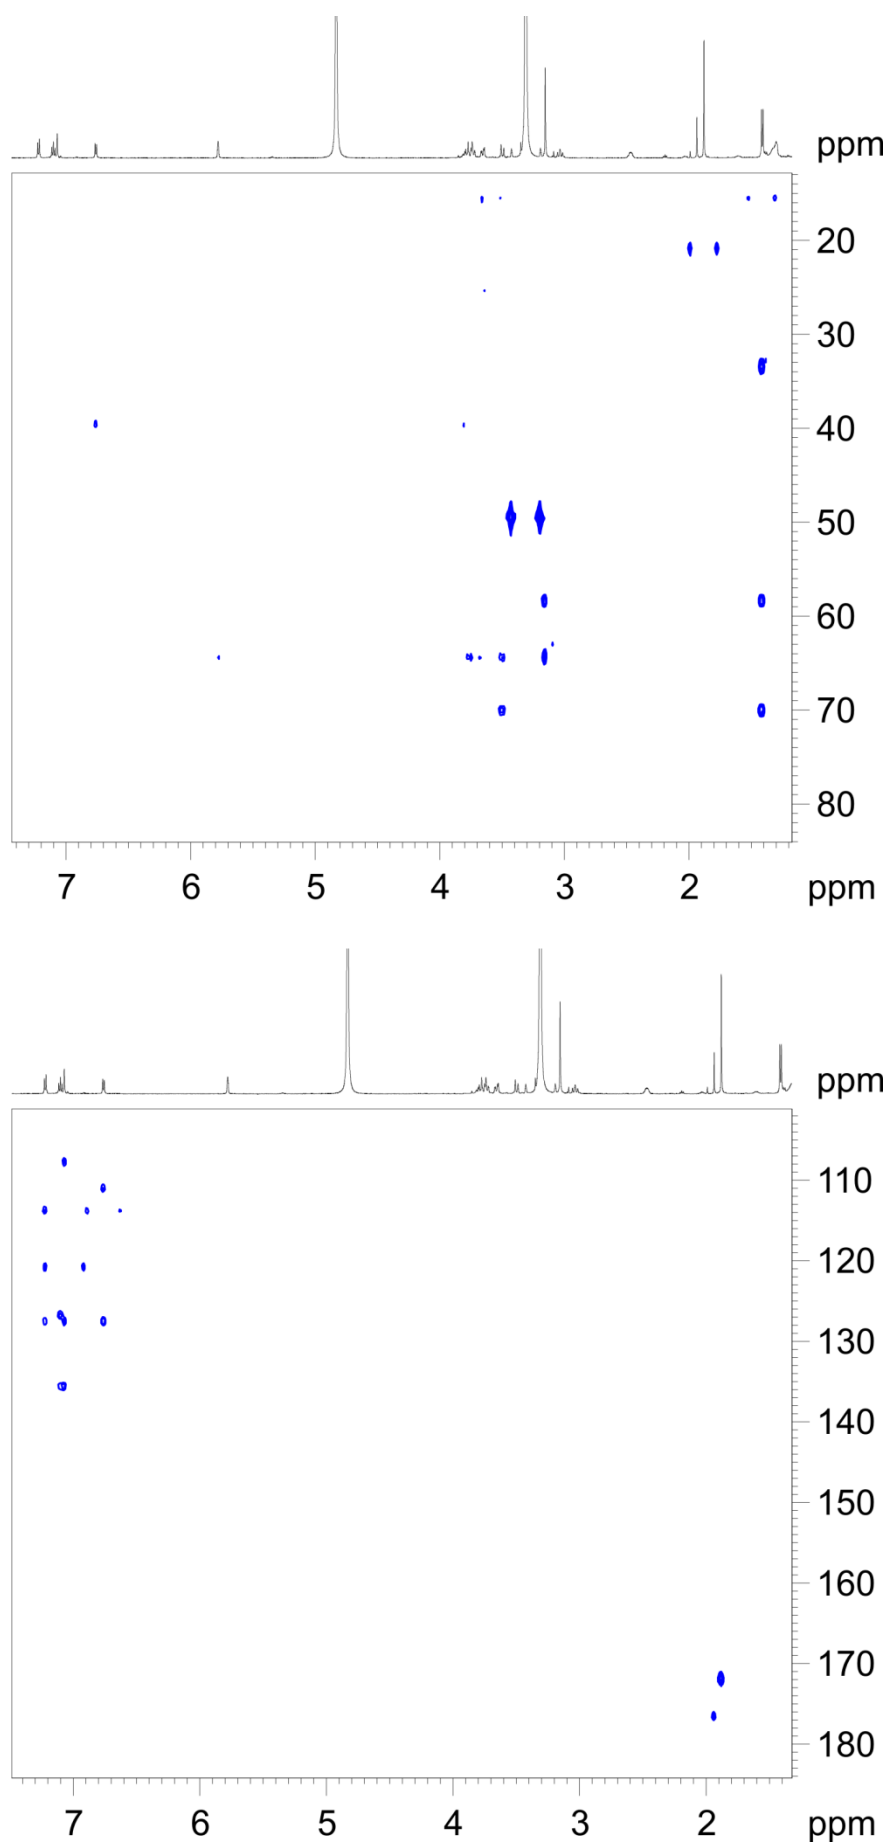

**Figure S2.4** HMBC spectrum of (8R,9S)-fumigaclavine A in protonated form in CD<sub>3</sub>OD

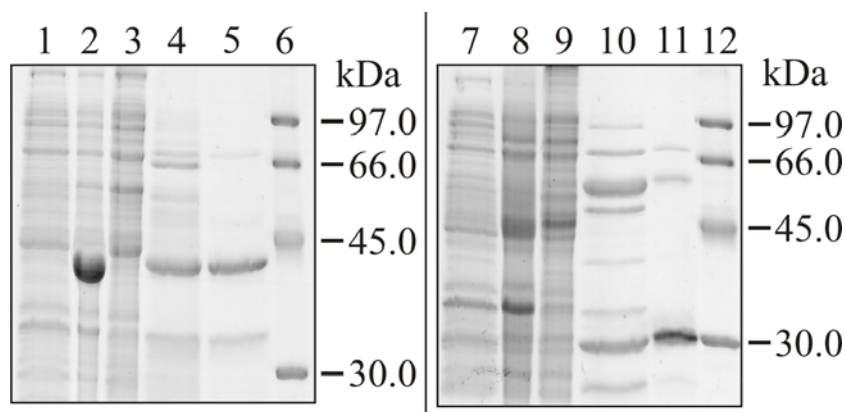

**Figure S3** Analysis of the overproduction and purification of His<sub>6</sub>-FgaOx<sub>3pc</sub> (lanes 1-5) and FgaFS<sub>pc</sub> (lanes 7-11). The proteins were separated on a 15% SDS-polyacrylamide gel and stained with Coomassie Brilliant Blue R-250. Lane 1: Total proteins before induction; 2: Total proteins after induction; 3: Soluble proteins after induction; 4: Ni-NTA elution of His<sub>6</sub>-FgaOx<sub>3pc</sub>; 5: Co-resin elution of His<sub>6</sub>-FgaOx<sub>3pc</sub>; 6: Molecular weight standard; Lane 7: Total proteins before induction; 8: Total proteins after induction; 9: Soluble proteins after induction; 10: Co-resin elution of His<sub>6</sub>-FgaFS<sub>pc</sub>; 11: Ni-NTA elution of His<sub>6</sub>-FgaFS<sub>pc</sub>; 12: Molecular weight standard

**Table S3**  $^1\text{H}$ -NMR and  $^{13}\text{C}$ -NMR data of pyroclavine in protonated form ( $\text{CD}_3\text{OD}$ )

| Position       | $\delta_{\text{C}}$ | $\delta_{\text{H}}$ , multi., $J$ in Hz | HMBC correlation                                                                        |
|----------------|---------------------|-----------------------------------------|-----------------------------------------------------------------------------------------|
| 2              | 120.29              | 7.03, d, 1.5                            | C-2 to H-4 $_{\alpha}$ , H-4 $_{\beta}$ , H-12                                          |
| 3              | 108.10              | -                                       | C-3 to H-2, H-4 $_{\alpha}$ , H-4 $_{\beta}$                                            |
| 4 $_{\alpha}$  | 25.55               | 2.99, ddd, 14.0, 11.6, 1.7              | C-4 to H-5, H-18                                                                        |
| 4 $_{\beta}$   |                     | 3.69, dd, 14.2, 4.5                     | -                                                                                       |
| 5 $_{\beta}$   | 69.84               | 3.30**, td, 11.0, 4.5                   | C-5 to H-4 $_{\alpha}$ , H-4 $_{\beta}$ , H-7 $_{\alpha}$ , H-9 $_{\beta}$ , H-12, H-18 |
| 7 $_{\alpha}$  | 62.86               | 3.51, dt, 12.8, 1.5                     | C-7 to H-17, H-18                                                                       |
| 7 $_{\beta}$   |                     | 3.41*, dd, 12.8, 3.9                    | -                                                                                       |
| 8 $_{\beta}$   | 28.12               | 2.49, m                                 | C-8 to H-7 $_{\alpha}$ , H-7 $_{\beta}$ , H-9 $_{\beta}$ , H-17, H-18                   |
| 9 $_{\alpha}$  | 32.72               | 2.63, ddt, 13.7, 3.6, 2.1               | C-9 to H-7 $_{\alpha}$ , H-17                                                           |
| 9 $_{\beta}$   |                     | 1.91, td, 13.1, 4.9                     | -                                                                                       |
| 10 $_{\alpha}$ | 35.56               | 3.41*, dt, 4.2, 11.6                    | C-10 to H-4 $_{\beta}$ , H-9 $_{\beta}$                                                 |
| 11             | 130.42              | -                                       | C-11 to H-9 $_{\beta}$ , H-10 $_{\alpha}$ , H-13                                        |
| 12             | 113.95              | 6.90, dd, 7.2, 0.8                      | C-12 to H-2, H-13, H-14                                                                 |
| 13             | 123.89              | 7.11, dd, 8.2, 7.2                      | C-13 to H-12                                                                            |
| 14             | 110.65              | 7.20, d, 8.2                            | C-14 to H-12                                                                            |
| 15             | 135.07              | -                                       | C-15 to H-2, H-13                                                                       |
| 16             | 126.81              | -                                       | C-16 to H-2, H-4 $_{\beta}$ , H-12, H-14                                                |
| 17             | 17.29               | 1.37, d, 7.5                            | C-17 to H-7 $_{\beta}$ , H-9 $_{\beta}$                                                 |
| 18             | 42.46               | 3.07, s                                 | -                                                                                       |

\* = overlapped signals,  $J$  measured from DQF-COSY cross peaks, \*\* = under the solvent signal

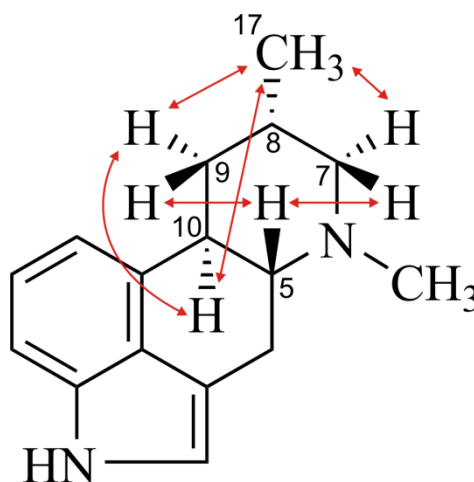

**Figure S4** NOE contacts (red arrows) for proving the stereochemistry of pyroclavine



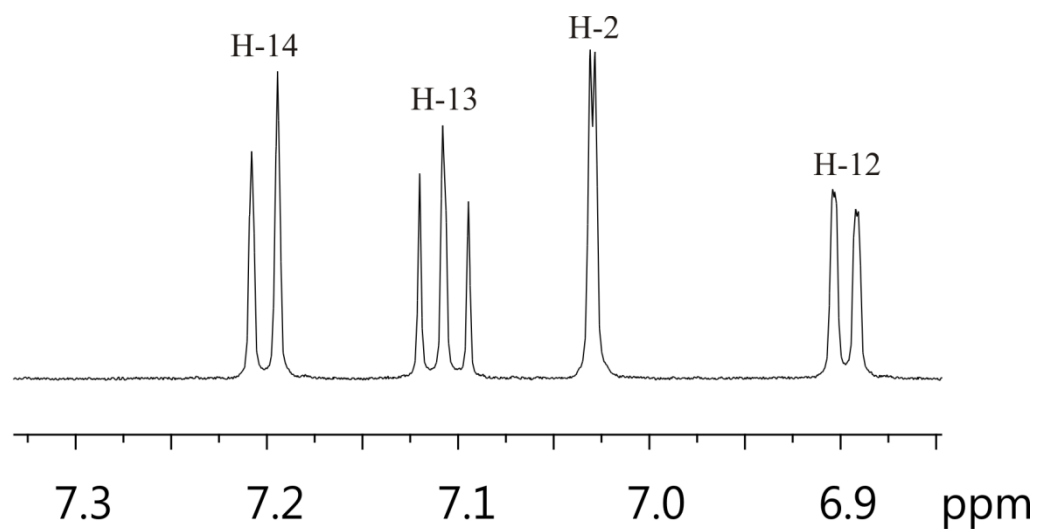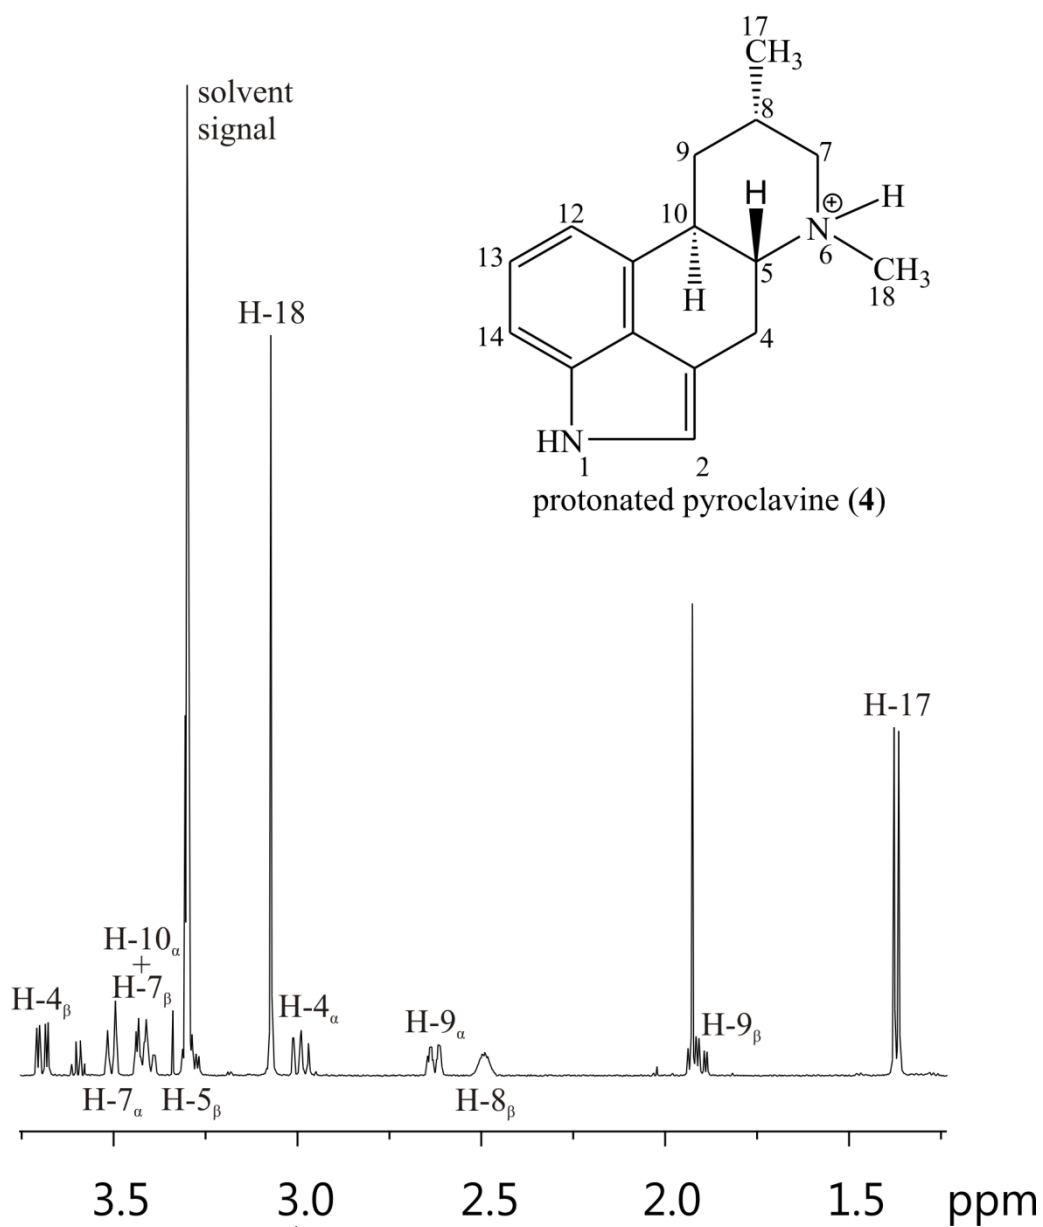

Figure S5.1 <sup>1</sup>H-NMR spectrum of **4** in protonated form in CD<sub>3</sub>OD

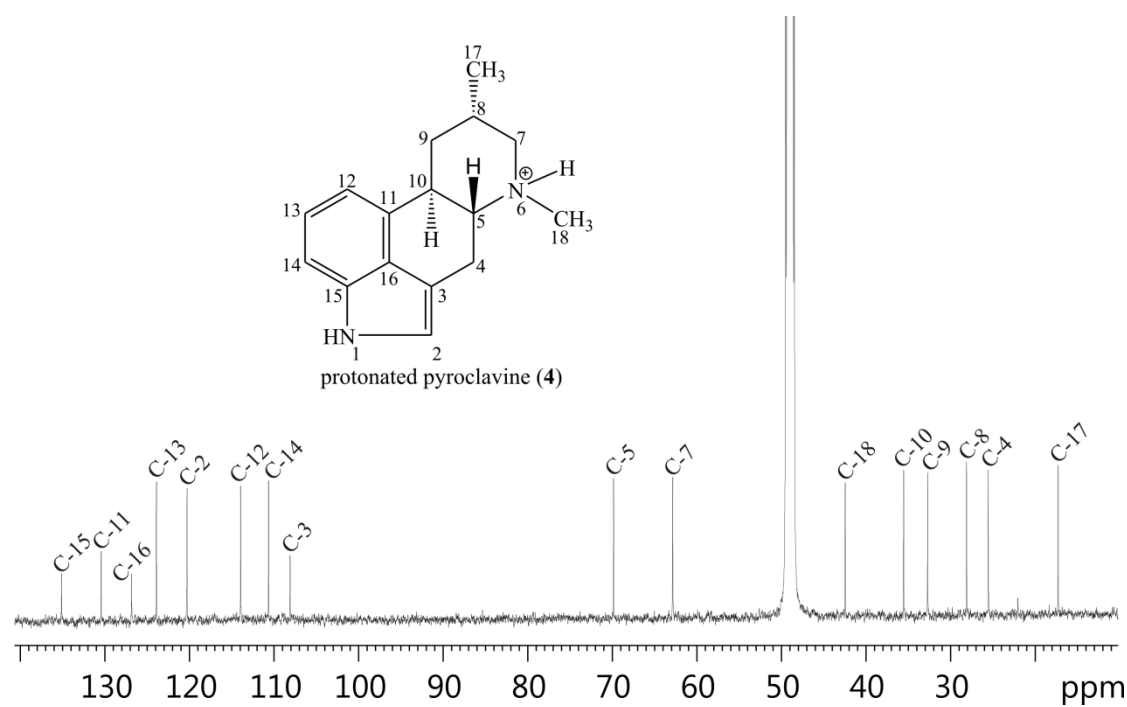

**Figure S5.2**  $^{13}\text{C}$ -NMR spectrum of **4** in protonated form in  $\text{CD}_3\text{OD}$

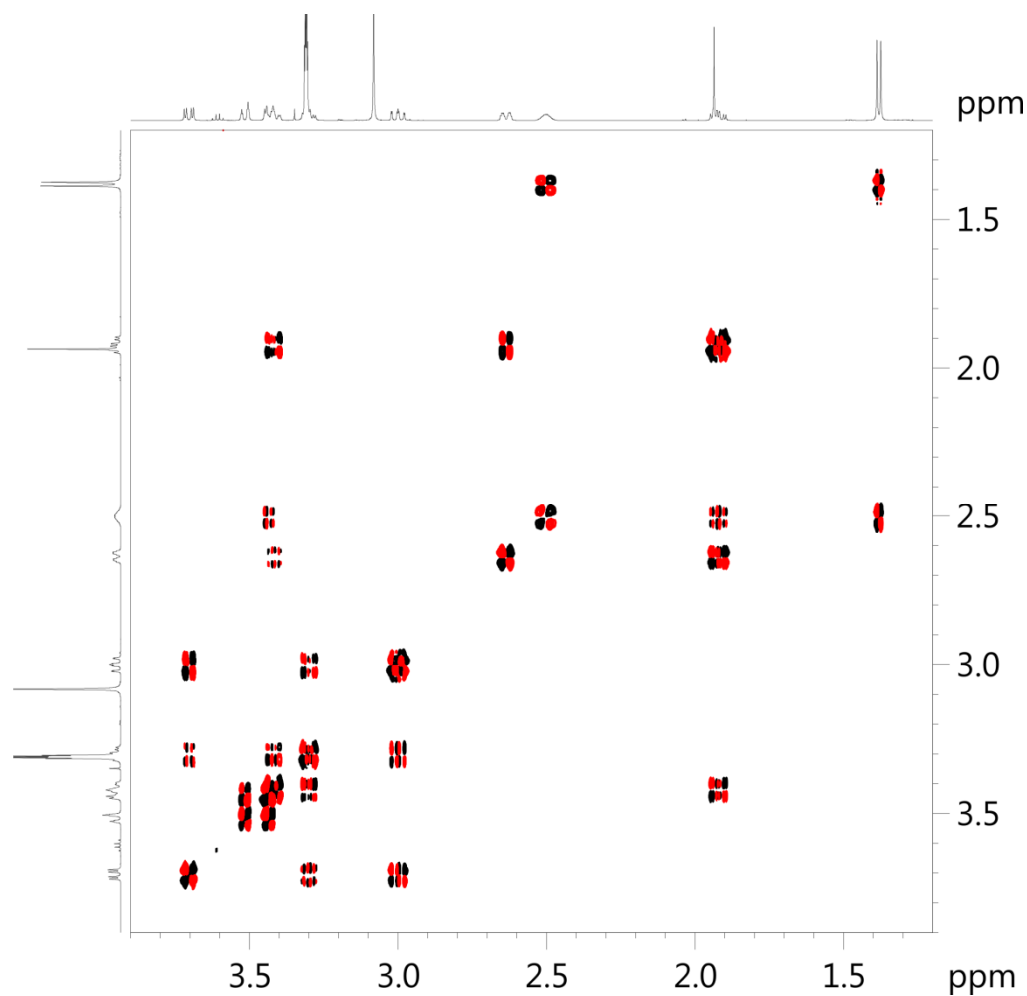

**Figure S5.3** DQF-COSY spectrum of **4** in protonated form in  $\text{CD}_3\text{OD}$

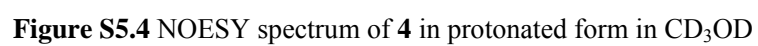

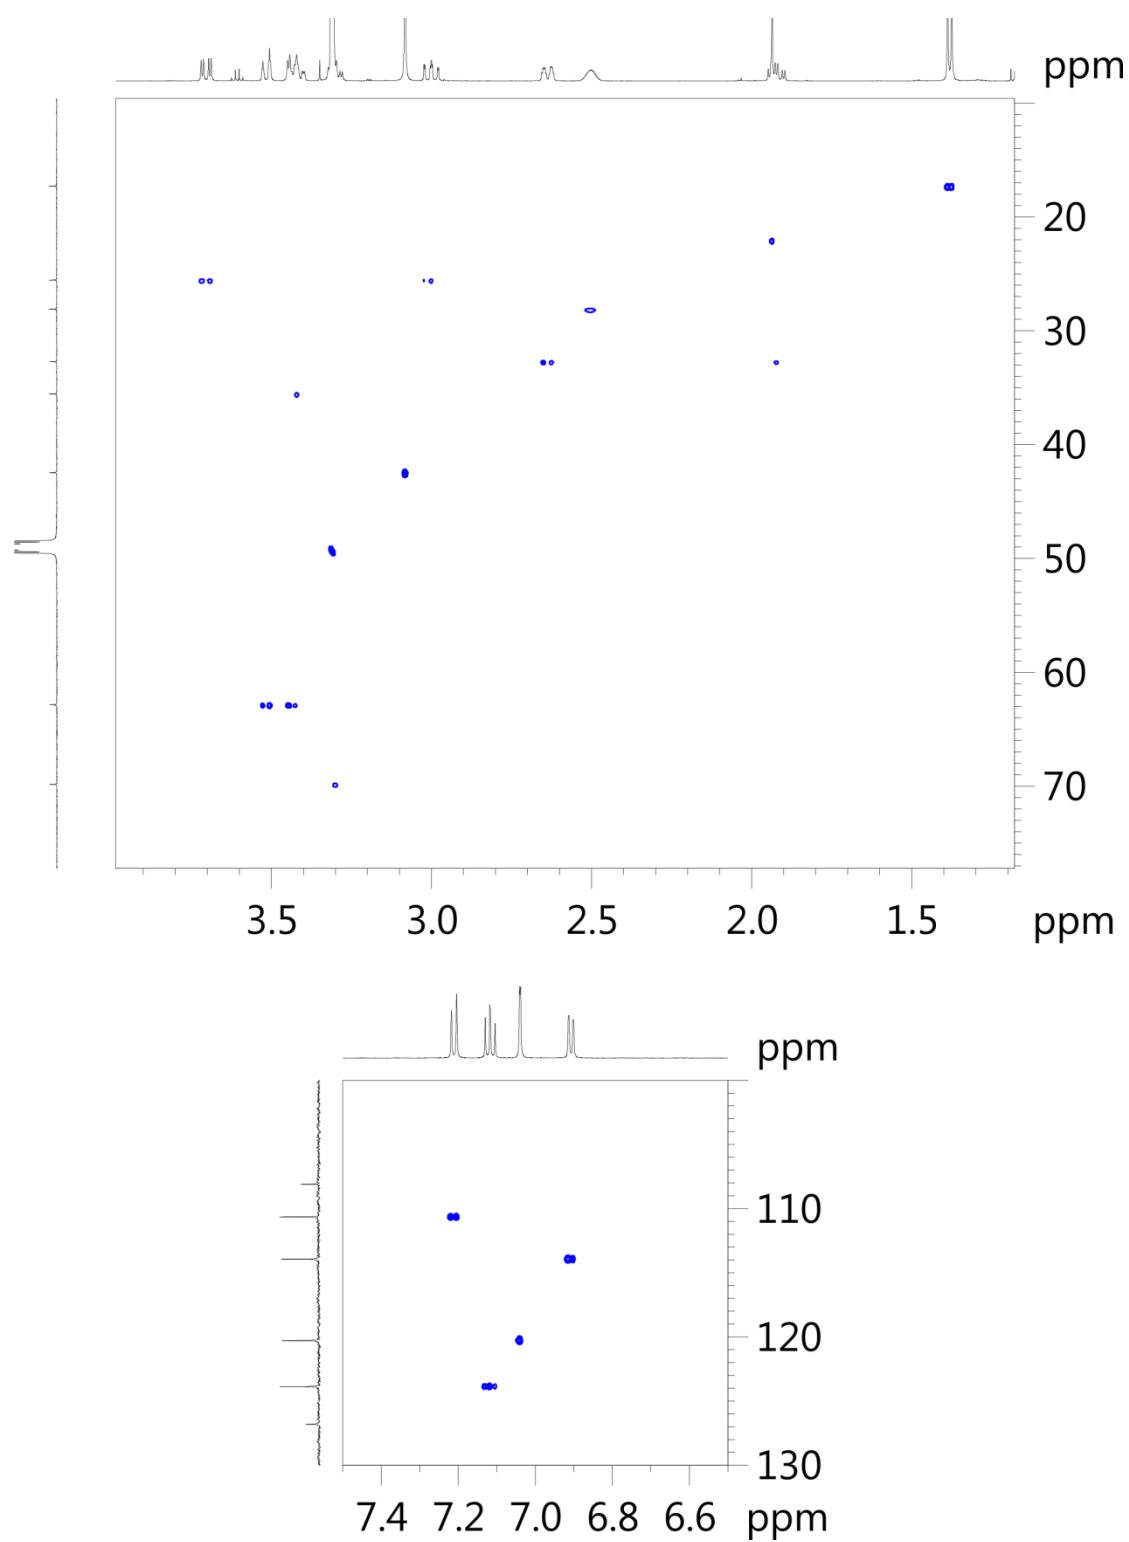

**Figure S5.5** Enhanced parts of the HSQC spectrum of **4** in protonated form in  $\text{CD}_3\text{OD}$

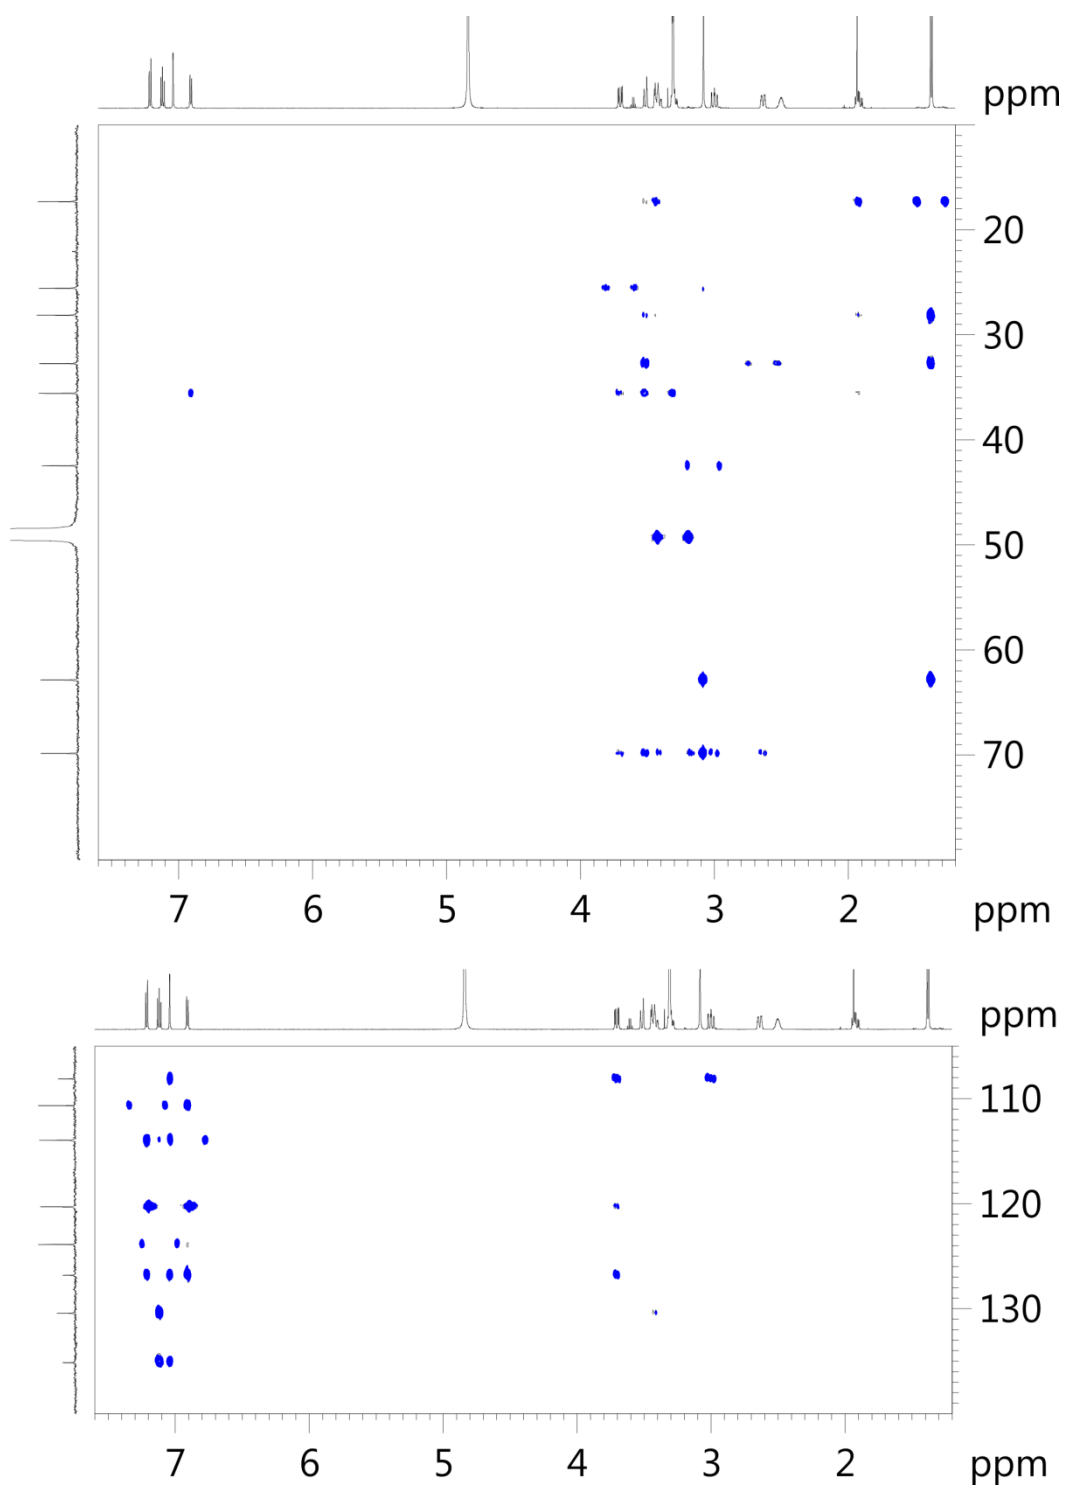

**Figure S5.6** HMBC spectrum of **4** in protonated form in  $\text{CD}_3\text{OD}$

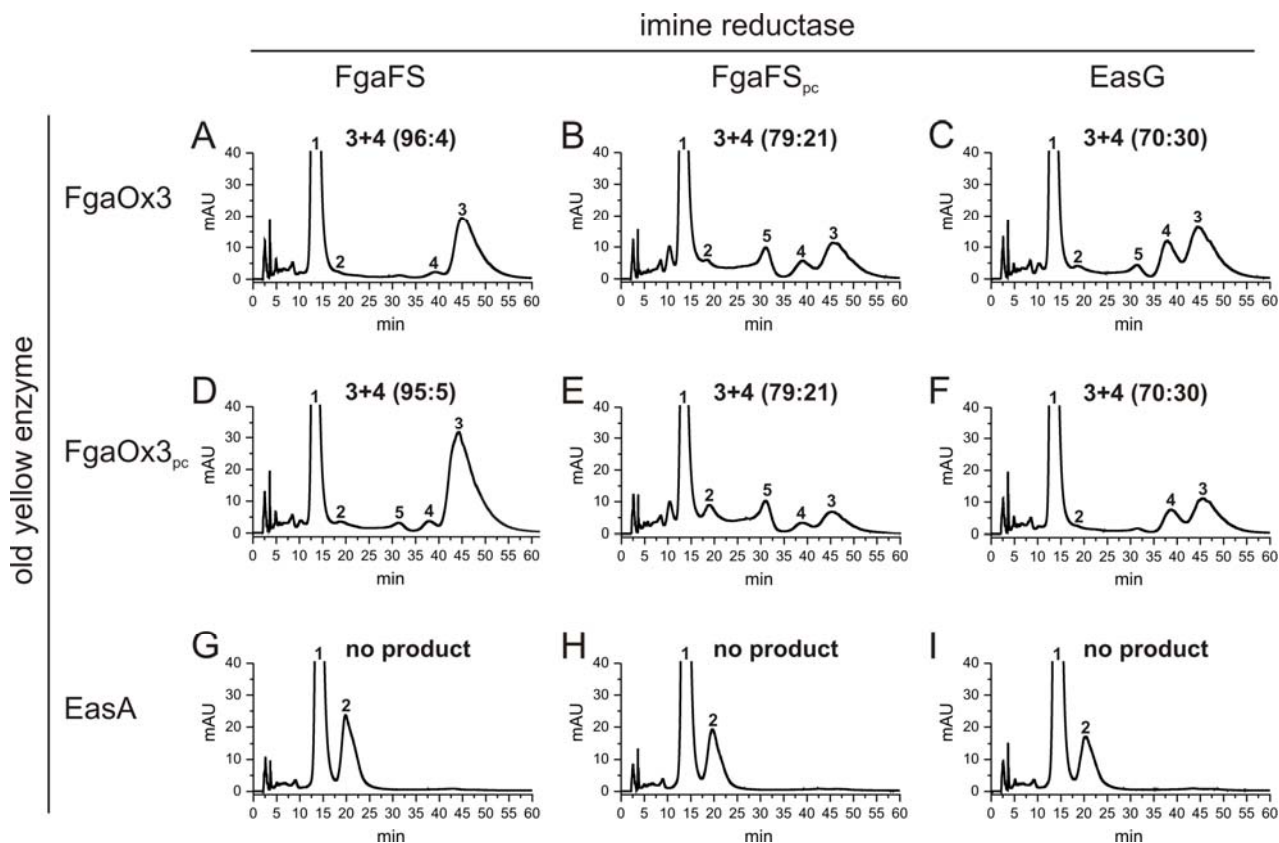

**Figure S6** HPLC chromatograms of dichloromethane extracts of the incubation mixtures with different enzyme combinations. The reaction mixtures contained 5 mM of the cofactors NAD<sup>+</sup>, FMN, NADPH, 1 mM chanoclavine-I and 5 µg of FgaDH, one old yellow enzyme and one imine reductase and were incubated at 30°C for 15 h. The substances were detected with a Photodiode Array detector and illustrated for absorption at 282 nm. 1: chanoclavine-I; 2: chanoclavine-I aldehyde; 3: festuclavine; 4: pyroclavine; 5: shunt product

**Table S4** Conversion of chanoclavine-I aldehyde to festuclavine and pyroclavine in the presence of NADPH or NADH. The assays contained 10 µg of the recombinant enzymes each and were incubated at 30°C for 15 h.

| enzyme combination                         | incubation with NADPH          |                   |                 | incubation with NADH           |                   |                 |
|--------------------------------------------|--------------------------------|-------------------|-----------------|--------------------------------|-------------------|-----------------|
|                                            | chanoclavine-I consumption (%) | ratio of products |                 | chanoclavine-I consumption (%) | ratio of products |                 |
|                                            |                                | festuclavine (3)  | pyroclavine (4) |                                | festuclavine (3)  | pyroclavine (4) |
| FgaOx3 <sub>pc</sub> + FgaFS               | 78                             | 95                | 5               | 28                             | 88                | 12              |
| FgaOx3 <sub>pc</sub> + FgaFS <sub>pc</sub> | 19                             | 80                | 20              | 5                              | 73                | 27              |
| FgaOx3 <sub>pc</sub> + EasG                | 70                             | 72                | 28              | 12                             | 63                | 37              |
| FgaOx3 + FgaFS                             | 79                             | 96                | 4               | 96                             | 92                | 8               |
| FgaOx3 + FgaFS <sub>pc</sub>               | 29                             | 81                | 19              | 28                             | 78                | 22              |
| FgaOx3 + EasG                              | 75                             | 71                | 29              | 63                             | 66                | 34              |
